# Supplementary material
Source: PubMed Central journal article supplement (PMC3133163)
Supplement: supp_193_10_2536__1.pdf [file supp_193_10_2536__1.pdf]

## Supplemental Material

### Identification of ArgP and Lrp as transcriptional regulators of *lysP*, the gene encoding the specific lysine permease of *Escherichia coli*

Jimena Ruiz<sup>1,2</sup>, Ina Haneburger<sup>1</sup> and Kirsten Jung<sup>1\*</sup>

<sup>1</sup>Ludwig-Maximilians-Universität München, Munich Center for integrated Protein Science (CiPSM) at the Department of Biology I, Microbiology, Großhaderner Straße 2-4, 82152 Martinsried, Germany

<sup>2</sup>current address: Departamento de Química Biológica, Facultad de Ciencias Exactas y Naturales, Universidad de Buenos Aires, Intendente Guiraldes 2160 (1427), Ciudad Autónoma de Buenos Aires, Argentina.

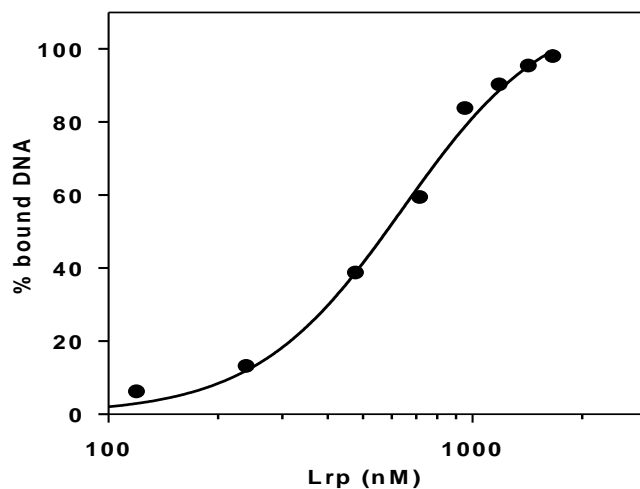

**Figure S1.** Binding profile obtained after the quantification of free DNA and Lrp-bound DNA in Figure 10C fitted using the Hill equation.
